# Supplementary material for: Genome Features of Asaia sp. W12 Isolated from the Mosquito Anopheles stephensi Reveal Symbiotic Traits
Source: MDPI journal article supplement (doi:10.3390/genes12050752), 2021-05-17
Supplement: s1 [file s1]

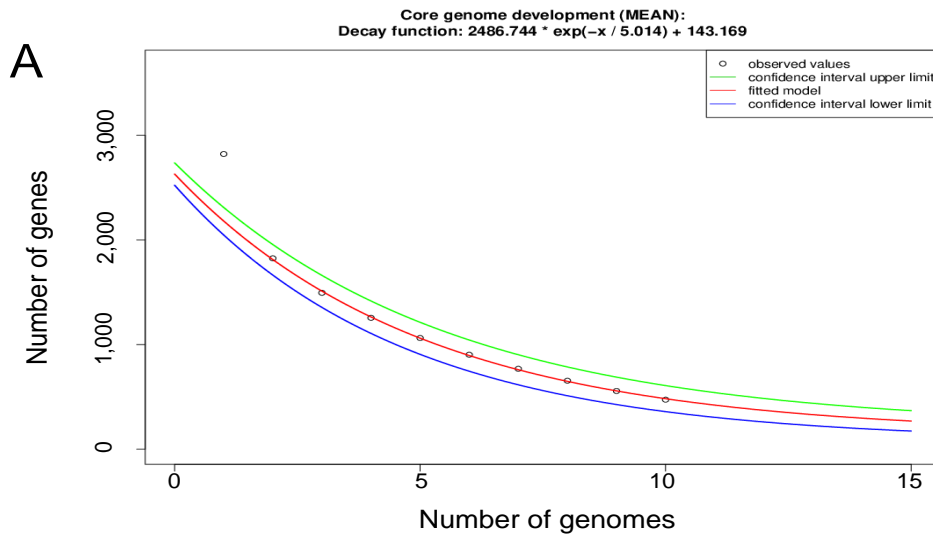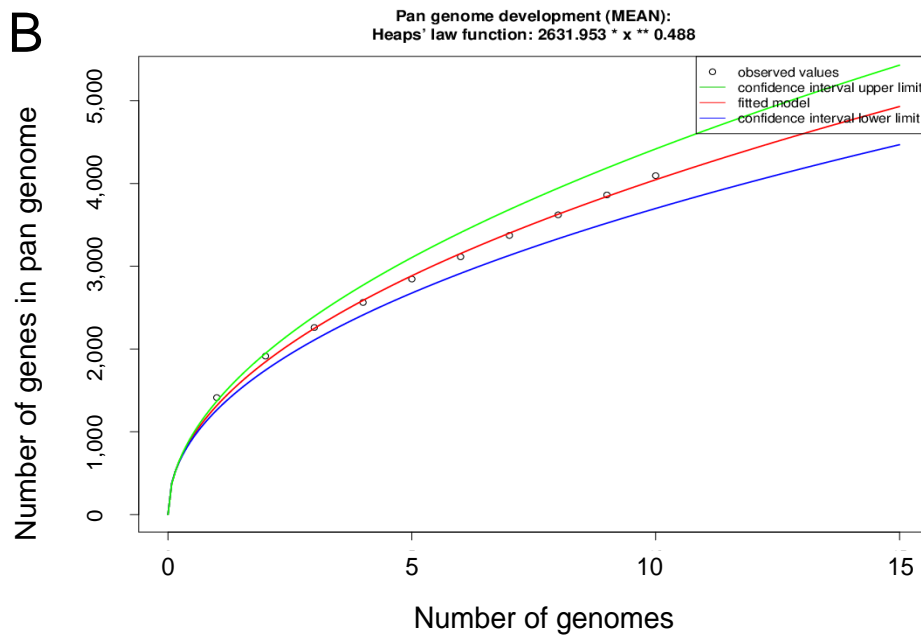

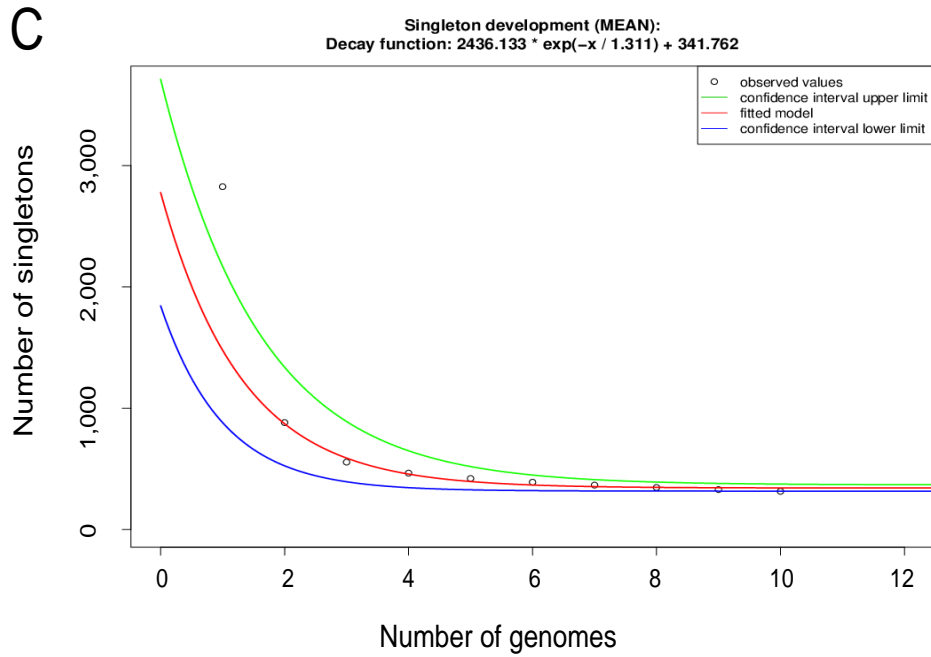

**Figure 1.** Core genome, pan genome and singleton genome evolution. **A)** Total number of genes (pan-genome) for a given number of genomes sequentially added. **B)** Number of shared genes (core genome) as a function of the number of genomes sequentially added. **C)** Number of unique genes (singleton genome) as a function of the number of genomes sequentially added.
